# Supplementary material for: Cops2 promotes pluripotency maintenance by Stabilizing Nanog Protein and Repressing Transcription
Source: PubMed Central journal article supplement (PMC4881025; doi:10.1038/srep26804), 2016-05-26
Supplement: srep26804-s1.pdf [file srep26804-s1.pdf]

## Supplementary Information

### **Cops2 promotes pluripotency maintenance by Stabilizing Nanog Protein and Repressing Transcription**

Weiyu Zhang<sup>1,5</sup>, Peiling Ni<sup>1,5</sup>, Chunlin Mou<sup>1,5</sup>, Yanqin Zhang<sup>1,5</sup>, Hongchao Guo<sup>1,2,5</sup>, Tong  
Zhao<sup>1</sup>, Yuin-Han Loh<sup>2,3\*</sup>, Lingyi Chen<sup>1,4\*</sup>

<sup>1</sup> State Key Laboratory of Medicinal Chemical Biology, Collaborative Innovation Center for Biotherapy, 2011 Collaborative Innovation Center of Tianjin for Medical Epigenetics, Tianjin Key Laboratory of Protein Sciences and College of Life Sciences, Nankai University, Tianjin 300071, China

<sup>2</sup> Epigenetics and Cell Fates Laboratory, A\*STAR Institute of Molecular and Cell Biology, 61 Biopolis Drive Proteos, Singapore 138673, Singapore

<sup>3</sup> Department of Biological Sciences, National University of Singapore, Singapore

<sup>4</sup> State Key Laboratory of Molecular Oncology, Cancer Institute/Hospital, Chinese Academy of Medical Sciences, Beijing 100021, China

<sup>5</sup> Co-first authors

\* Correspondence: [yhloh@imcb.a-star.edu.sg](mailto:yhloh@imcb.a-star.edu.sg) (Y-H.L.), [lingyichen@nankai.edu.cn](mailto:lingyichen@nankai.edu.cn) (L.C.)

**Running Title:** *Role of Cops2 in pluripotency maintenance*

## Supplementary Figures and Legends

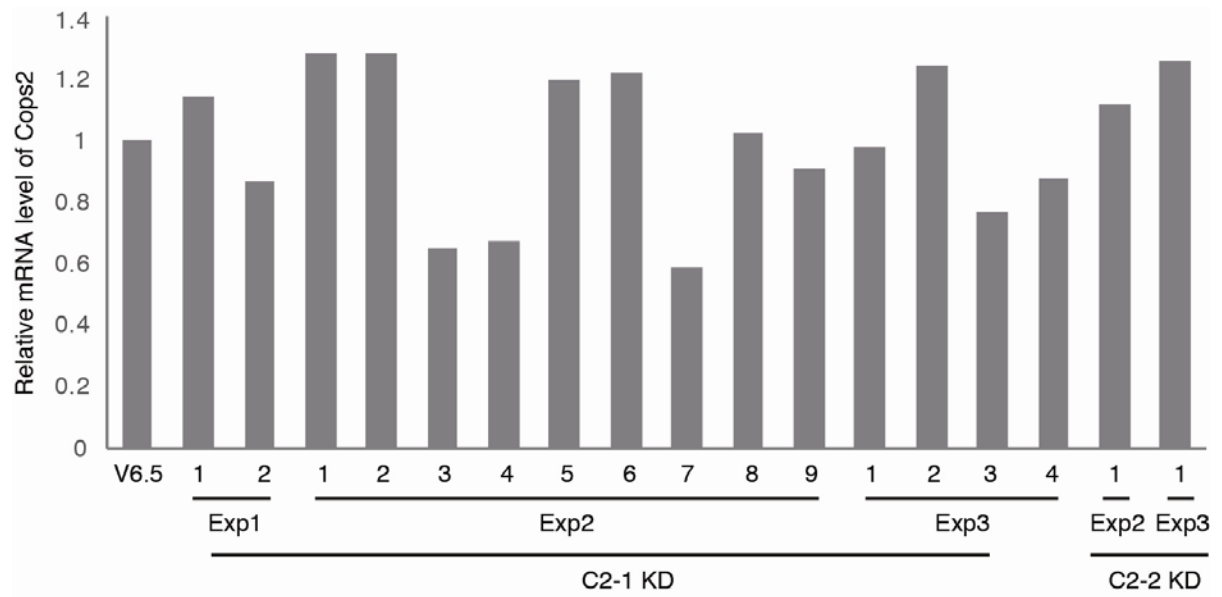

**Supplementary Figure S1.** The expression of *Cops2* mRNA in the surviving *Cops2* KD ESC clones shown in supplementary Table S1.

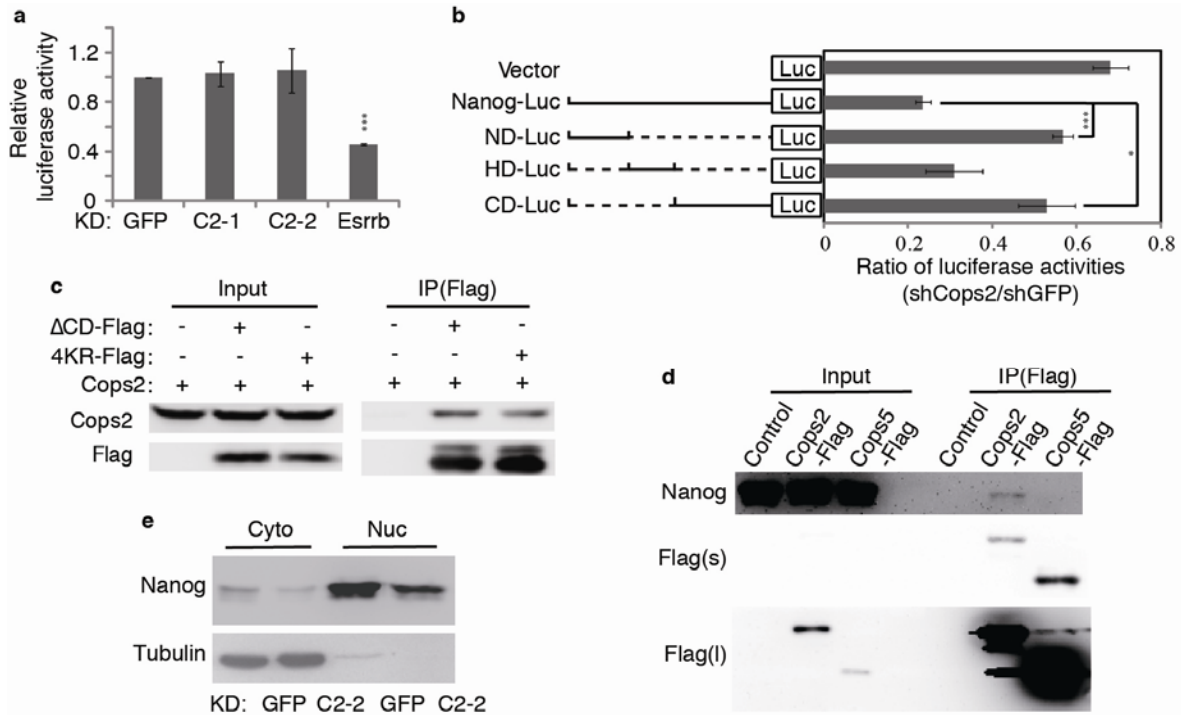

**Supplementary Figure S2. Cops2 regulates the expression of Nanog by promoting Nanog protein stability, rather than transcriptional regulation.** (a) A luciferase reporter vector was constructed with the 6-kb *Nanog* promoter. The *Nanog* reporter plasmid and pRV-SV40, together with shRNA plasmids targeting *GFP*, *Cops2*, or *Esrrb*, were transfected into ESCs. Twenty-four hours after transfection, luciferase activities were measured. Data are shown as mean  $\pm$  SD (n=3). (b) A series of reporter vectors were constructed by fusing full-length Nanog, ND, HD, or CD of Nanog to the luciferase, and the chicken  $\beta$ -Actin promoter was used to drive the expression of luciferases. These reporter plasmids and pRV-SV40, together with shRNA plasmids targeting *GFP* or *Cops2*, were transfected into ESCs. Twenty-four hours after transfection, luciferase activities were measured. The ratios of reporter activities in *Cops2* KD ESCs to those in *GFP* KD ESCs were plotted. Data are shown as mean  $\pm$  SD (n=3). (c) The interaction between Nanog and Cops2 in ESCs. Co-IP experiments were carried out with cell extracts prepared from control ESCs, and ESCs expressing Flag-tagged Cops2 or Cops5. Short (Flag(s)) and long (Flag(l)) exposure of the anti-Flag blot are shown. (d) 4KR mutation does not affect the interaction between Cops2 and Nanog. Flag-tagged  $\Delta$ CD or 4KR  $\Delta$ CD Nanog mutants, together with Cops2, were overexpressed in HEK293T cells. Co-IP and Western blot were carried out to detect the interaction between Cops2 and Nanog mutants. (e) Knockdown of Cops2 does not affect the cytoplasmic and nuclear distribution of Cops2. Nuclear and cytoplasmic fractions were prepared from ESCs transfected with shRNA plasmids targeting *GFP* or *Cops2*, and subjected to Western blot assay.

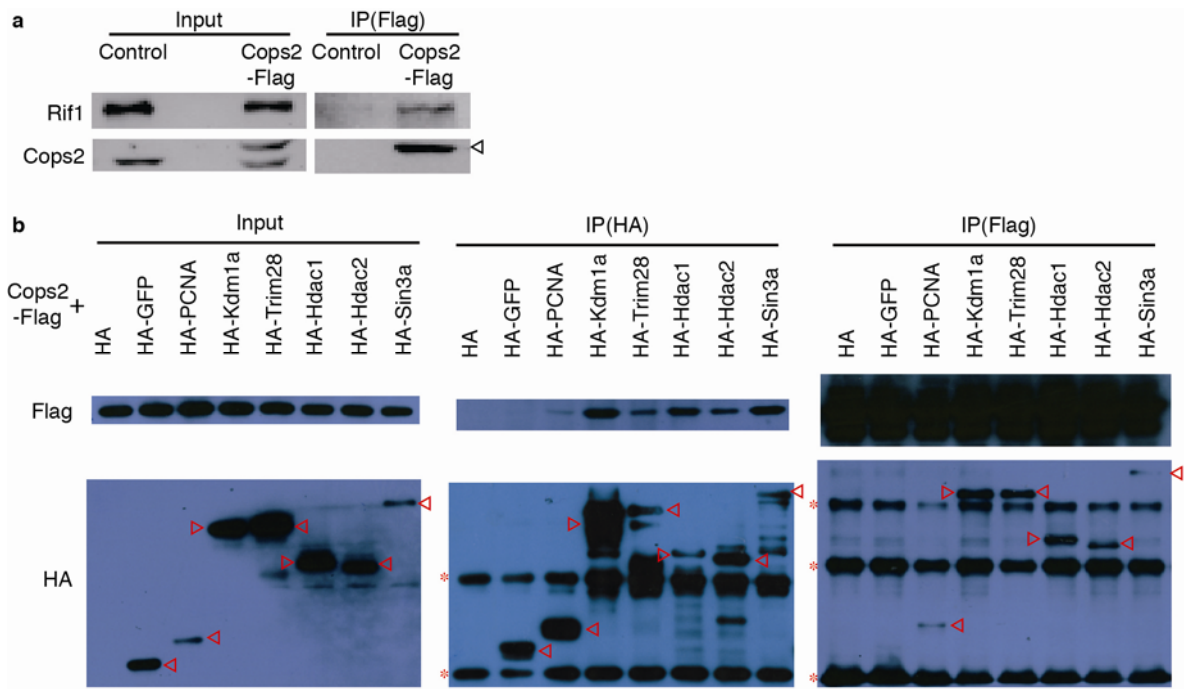

**Supplementary Figure S3. Cops2 interacts with subunits of repressive complexes.** (a) Co-IP experiment to detect the interaction between Cops2 and Rif1 in ESCs expressing Flag-tagged Cops2. The band of Flag-tagged Cops2 is marked with a black triangle. The lower band in the anti-Cops2 blot is the endogenous Cops2. (b) Co-IP experiments to detect the interaction of Cops2 with subunits of repressive complexes. Flag-tagged Cops2, together with HA-tagged GFP, PCNA, Kdm1a, Trim28, Hdac1, Hdac2, or Sin3a, were expressed in HEK293T cells. Anti-Flag and anti-HA Co-IP experiments were carried out with cell extracts from these cells. Specific bands in the HA blots are marked with red triangles. Non-specific and IgG bands are labelled with asterisks.

## Supplementary Tables

**Supplementary Table S1.** Colony numbers after selection for stable shRNA knockdown ESCs

| Target gene  |         | Experiment |     |     |
|--------------|---------|------------|-----|-----|
|              |         | 1          | 2   | 3   |
| GFP          |         | 158        | 155 | 91  |
| Cops1        |         | ND         | 84  | ND  |
| Cops2<br>(*) | shRNA-1 | 2          | 9   | 4   |
|              | shRNA-2 | 0          | 1   | 1   |
| Cops3        |         | ND         | 95  | 89  |
| Cops4        |         | ND         | 52  | ND  |
| Cops5        |         | ND         | 125 | 108 |
| Cops6        |         | ND         | 91  | ND  |
| Cops7a       |         | ND         | 116 | ND  |
| Cops7b       |         | ND         | 182 | ND  |
| Cops8        |         | 215        | 284 | 192 |

\*: Less than 2-fold reduction of *Cops2* mRNA in all the *Cops2* KD ESC clones (supplementary Fig. S1).  
ND: Not determined.

**Supplementary Table S2.** Primers for quantitative RT-PCR and ChIP.

| Assay               | Gene                 | Forward primer            | Reverse primer               |
|---------------------|----------------------|---------------------------|------------------------------|
| Quantitative RT-PCR | <i>Bmp4</i>          | ACAGCCGGTCCAGGAAGAAGAAT   | TGCACAAATGGCATGGTTGGT        |
|                     | <i>Cdx2</i>          | CAGTCCCTAGGAAGCCAAGTGAAA  | AAGTGAAACTCCTTCTCCAGCTCC     |
|                     | <i>Flkl1</i>         | CAGGAAACTACACGGTCATCCTCA  | AGGAATCCATAGGCGAGATCAAGG     |
|                     | <i>Gata4</i>         | GCTATGCATCTCCTGTCACTCAGA  | CCAAGTCCGAGCAGGAATTTGAAG     |
|                     | <i>Gata6</i>         | CTTCTCCTTCTACACAAGCGACCA  | ATACTTGAGGTCACTGTTCTCGGG     |
|                     | <i>Hand1</i>         | AAGGATGCACAAGCAGGTGAC     | TTAATCCTCTTCTCGCCGGG         |
|                     | <i>Nanog</i>         | TACAAGGGTCTGCTACTGAGATGC  | TTGGGACTGGTAGAAGAATCAGGG     |
|                     | <i>Nestin</i>        | CTGGATCTGGAAGTCAACAGAGGT  | ATCCTCAGTTTCCACTCCTGTAGC     |
|                     | <i>Nkx2.5</i>        | ACTATGCCCTGTCCCTCAGATTTC  | TCCTAGTGTGGAATCCGTCGAAAG     |
|                     | <i>Oct4</i>          | ATCAGCTTGGGCTAGAGAAGGATG  | AAAGGTGTCCCTGTAGCCTCATA      |
|                     | <i>Pax6</i>          | TAACGGAGAAGACTCGGATGAAGC  | GGGCAAACACATCTGGATAATGGG     |
|                     | <i>Sox17</i>         | CCCAACTCTCCCAAAGTATCT     | TCTCTGTCTTCCCTGTCTTGTTG      |
|                     | <i>Sox2</i>          | GCGGAGTGGAACCTTTTGTC      | CGGGAAGCGTGTACTTATCCTT       |
|                     | <i>T</i>             | CATCGGAACAGCTCTCCAACCTAT  | TACCATTGCTCACAGACCAGAGAC     |
|                     | <i>β-Actin</i>       | CAGAAGGAGATTAAGTCTGCTGCT  | TACTCCTGCTTGCTGATCCACATC     |
|                     | <i>Ddit4l</i>        | CCTGGGAGTCTGCTAAGTG       | TTTGGTTTGCTTTGATCTGGAC       |
|                     | <i>Sp110</i>         | AAAGCCCGTCAAGATGAG        | ATCCTTGTCTCTGTGTCTTTGG       |
|                     | <i>Tdpoz2</i>        | AAAGCCAGTGTCTCCTTAG       | TGCCCTAACTTGCTCTTTGG         |
|                     | <i>Cops1</i>         | GTATGAAGAGATACCCGGAAGC    | TCCAGTTTCAACAGAGCCTTC        |
|                     | <i>Cops2</i>         | CATCCCTCACCCACTAATCATG    | TCTTGGGCTTCCCTGATTCATC       |
|                     | <i>Cops3</i>         | AGAAAACAGCCCTTCGAG        | AGAAAACAGCCCTTCGAG           |
|                     | <i>Cops4</i>         | CGCCCAGAGGTACAATGAG       | AAAAGAGTAGCCAGCATCCG         |
|                     | <i>Cops5</i>         | CGCCCAGAGGTACAATGAG       | AAAAGAGTAGCCAGCATCCG         |
|                     | <i>Cops6</i>         | TGAACCTATGACCAAGCAC       | GATCCGTTAGCTTCCCTCAG         |
|                     | <i>Cops7a</i>        | TGTGTATGCTGATGTCCTTCG     | AACACAACCTCACAGCCAC          |
|                     | <i>Cops7b</i>        | GGAAGTGGATTTCTGCATTGG     | TCTCTTTGTACTGGTTGGCTC        |
| <i>Cops8</i>        | ACTTGCTCCAGAACGACATG | GATGGTTGTATAGATCCCAGGG    |                              |
| ChIP                | <i>Sp110</i>         | TGAGGAGACATTCGGCATCTA     | GTCTCTCACTCTCAGTCCAA         |
|                     | <i>Ddit4l</i>        | CTGTCGGTTACTGCAGGTATATG   | TTCCACCGGGACAAAGTTATAG       |
|                     | <i>Tdpoz2</i>        | AGCTAGACAGATATGACCAACAC   | CAGGCAGAAAGTAAGGCTACA        |
|                     | <i>Cops2</i>         | CAGCTCCTTGAAGTGGATCAT     | ACAGCCTGGTTTACAGAAATTTA      |
|                     | <i>Tcfap2a</i>       | CCTGTGGCCGCAAGGATGACTGAGT | GCACTTTGCGCTAACCCAGAGTAGCTCC |
|                     | <i>Kcnh5</i>         | AGGTCTACAGTGTGTTGTATC     | GAGCTGGAATATGGCGAGAA         |
|                     | <i>Sp110-C</i>       | GTCTCATGCTTACTTCTGTCAC    | ACTGTGGTACACGCTCAC           |
